# Supplementary material
Source: PubMed Central journal article supplement (PMC3375983)
Supplement: supp_pp.111.191700_191700Supplemental_Figure_1.pdf [file supp_pp.111.191700_191700Supplemental_Figure_1.pdf]

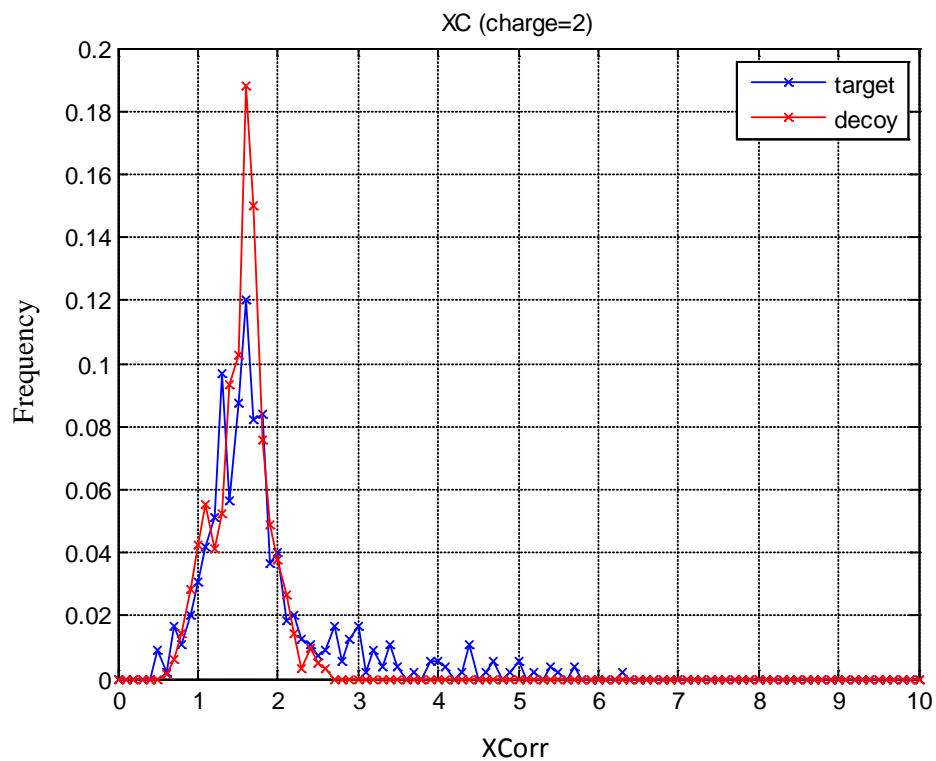

**Supplemental Figure 1.** Example of peptide filtering. A plot of the frequency of XCorr values at charge state 2 for the matched target and decoy soybean database entries after SEQUEST searches and applying a 5 ppm filter. An XCorr filter of 2.81 obtained an estimated FDR of 0.12%.
