# Supplementary material
Source: PubMed Central journal article supplement (PMC3375983)
Supplement: supp_pp.111.191700_191700Supplemental_Figure_2.pdf [file supp_pp.111.191700_191700Supplemental_Figure_2.pdf]

# Biological Process

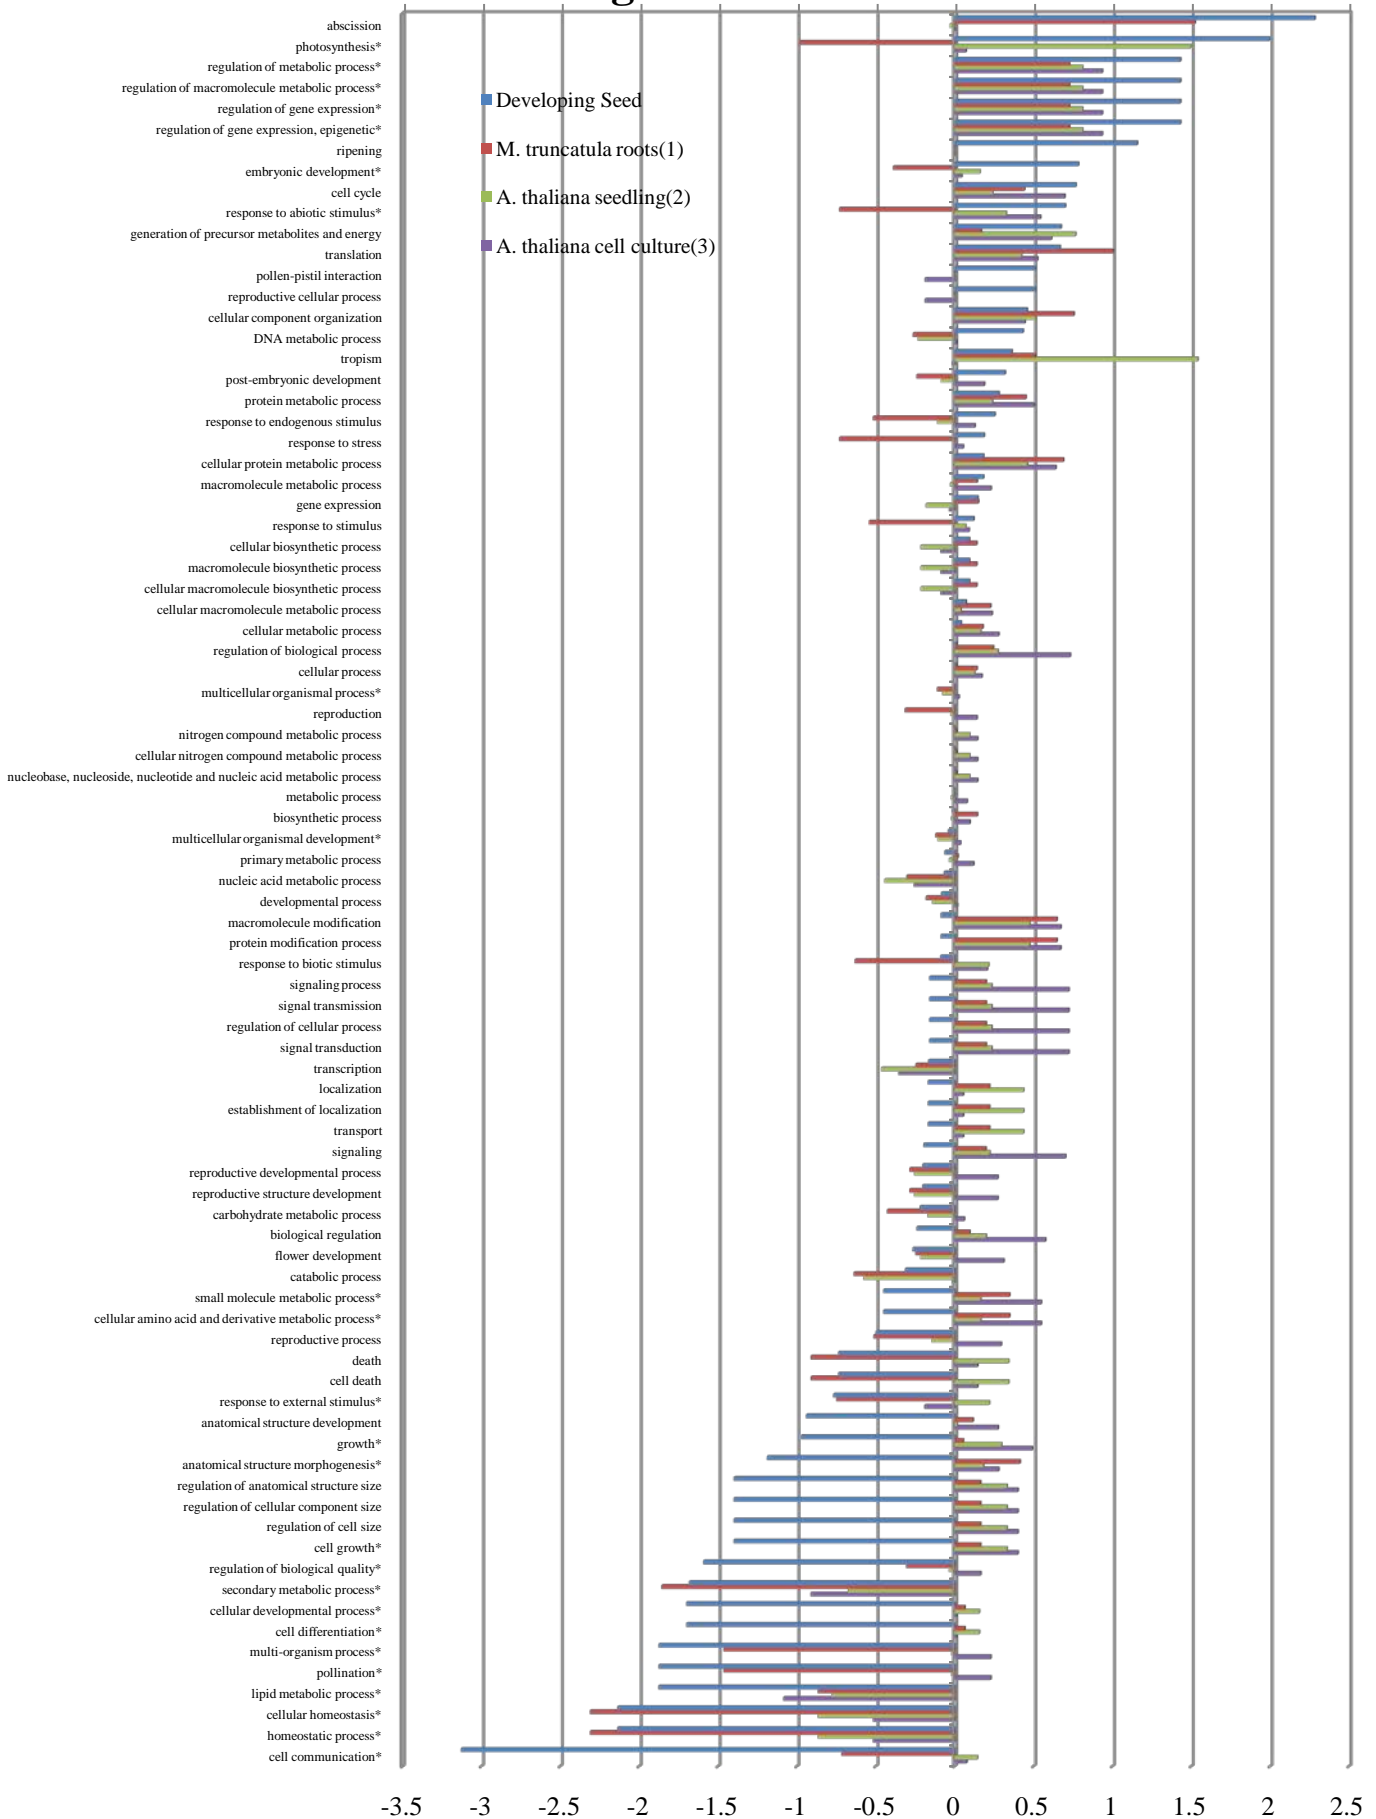

# Cellular Component

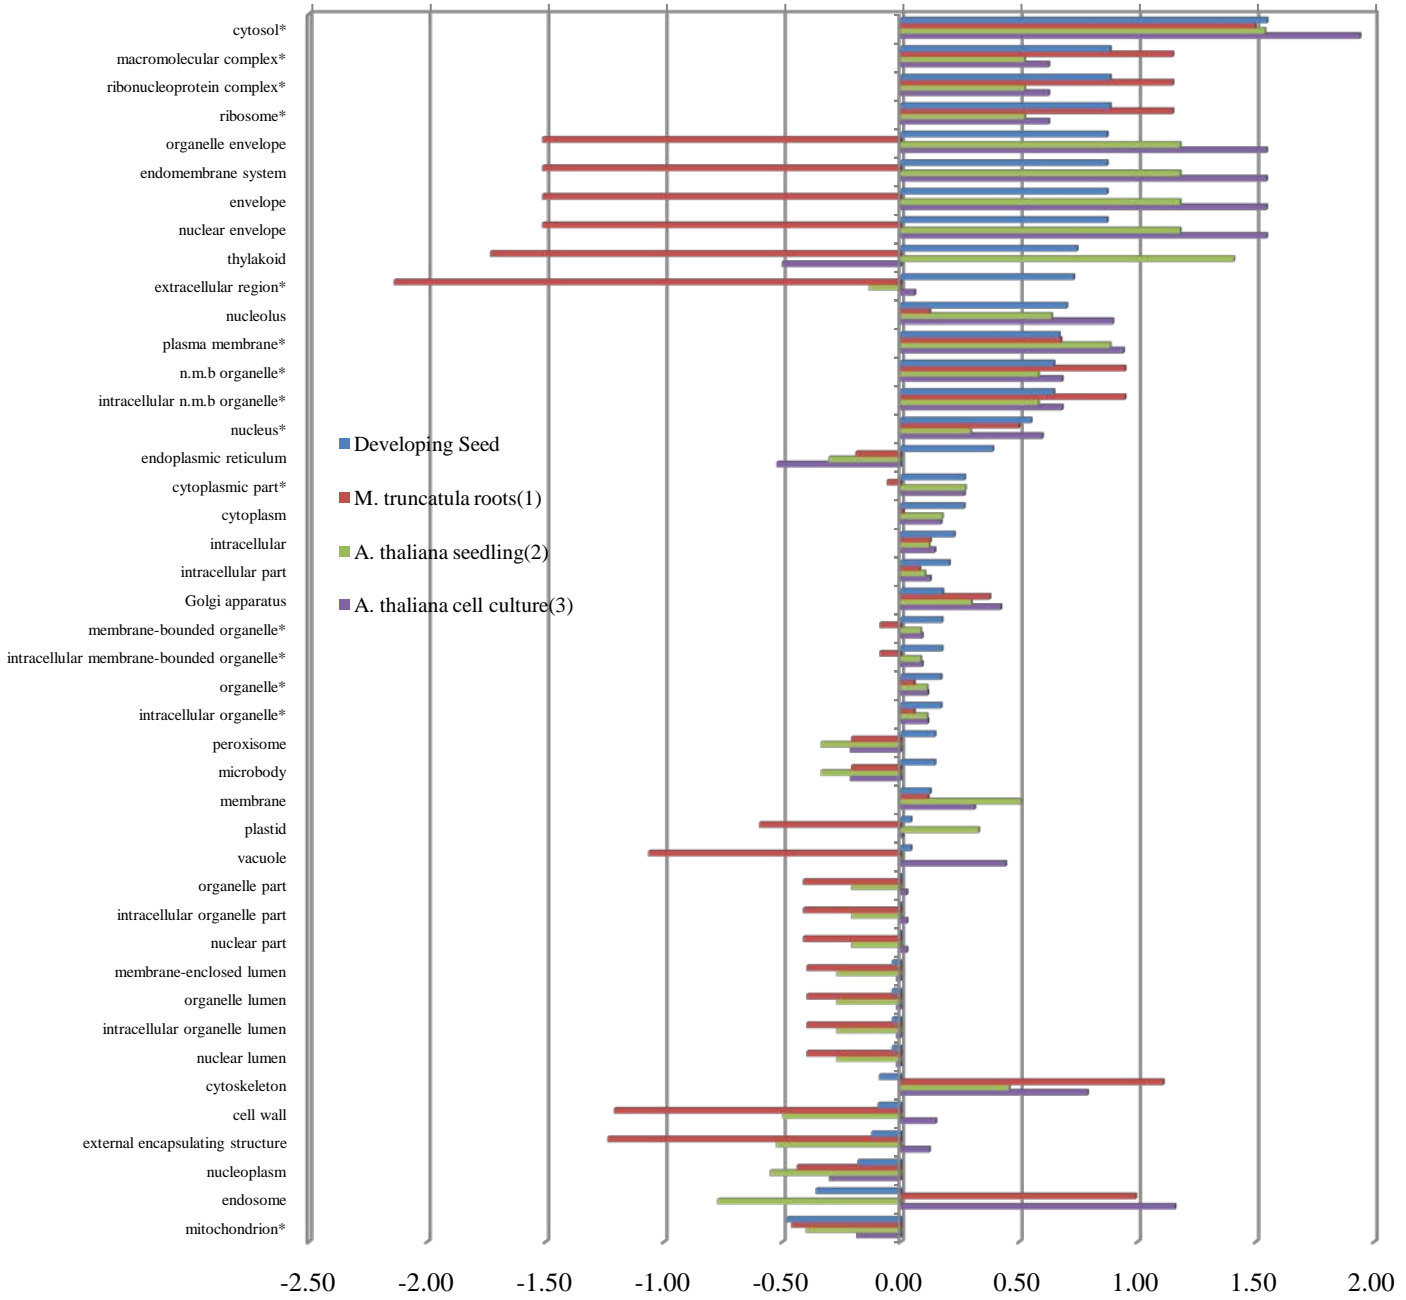

# Molecular Function

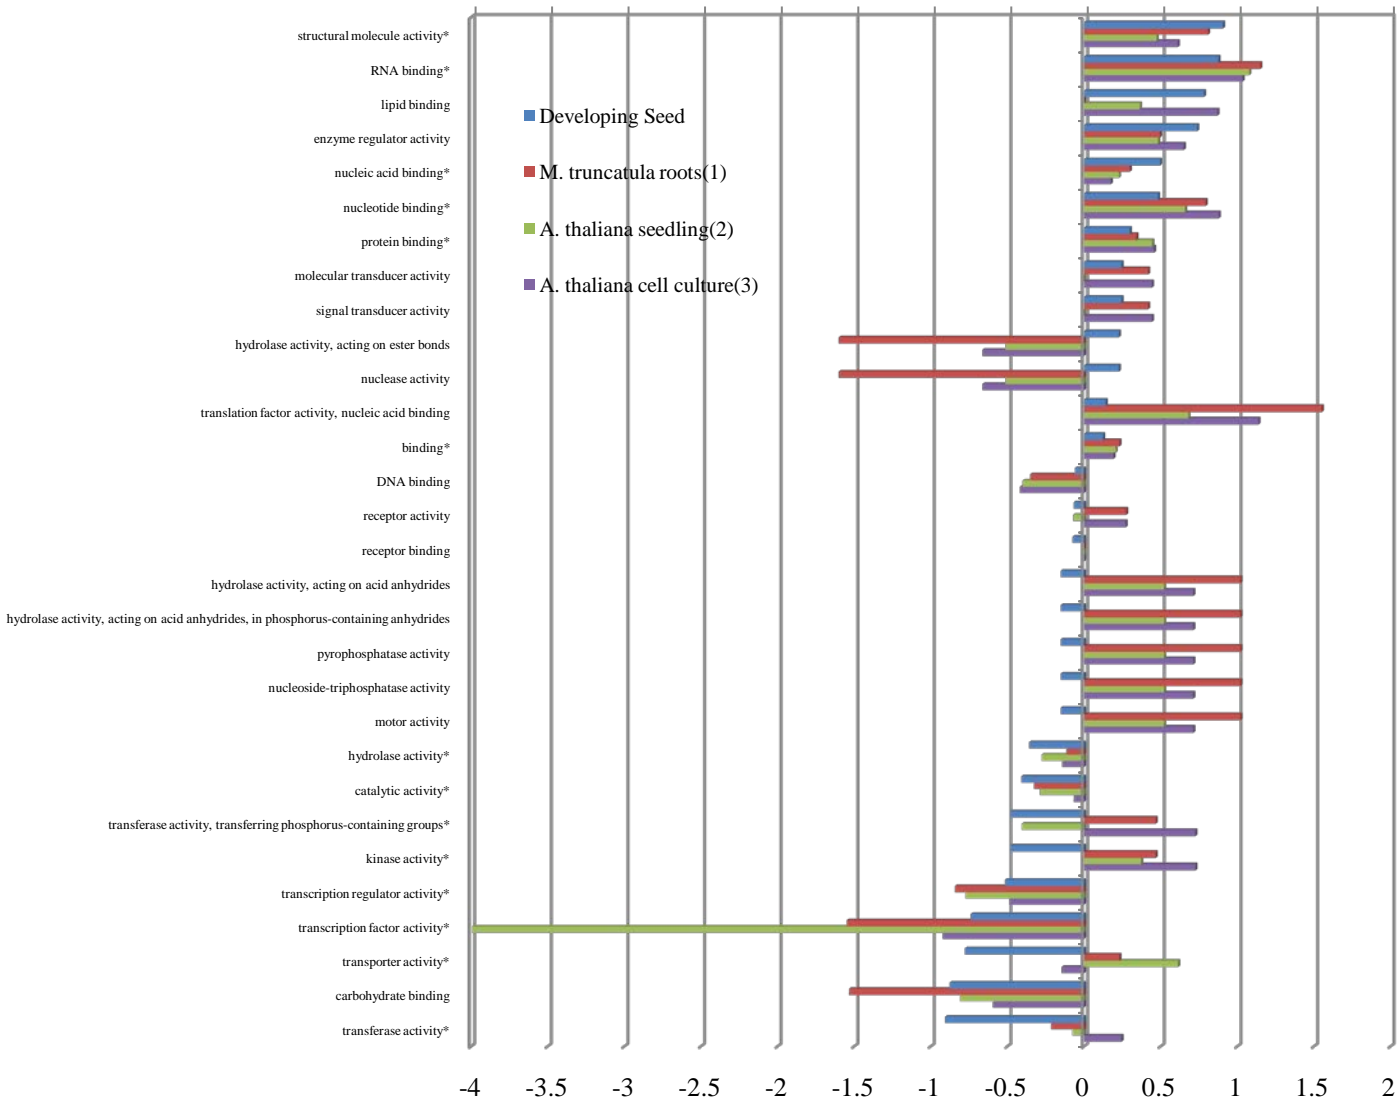

\* GO term within developing seeds identified as having statistically significant differential levels as compared to the Arabidopsis proteome via FISHER exact test.  
 (1) GO terms for phosphoproteins identified in *M. truncatula* roots by Grimsrud et al. (2010)  
 (2) GO terms for phosphoproteins identified in Arabidopsis shoots by Reiland et al. (2009)  
 (3) GO terms for phosphoproteins identified in Arabidopsis cell culture by Sugiyama et al. (2008)

**Supplemental Figure 2.** Distribution of GO terms in four large scale phosphoproteomic studies. Frequency of GO terms for our study along with three other large-scale studies and the Arabidopsis proteome were obtained using Blast2GO. The distribution of GO terms for each study were normalized to the frequencies in the Arabidopsis proteome and plotted on a log<sub>2</sub> scale. (A) Biological Process, (B) Molecular Function, and (C) Cellular Component
